# Supplementary material for: Effects of Manganese Porphyrins on Cellular Sulfur Metabolism
Source: MDPI journal article supplement (doi:10.3390/molecules25040980), 2020-02-22
Supplement: s1 [file s1]

## Supplementary material

# Effects of Manganese Porphyrins on Cellular Sulfur Metabolism

Kenneth R. Olson<sup>a,b</sup>, Yan Gao<sup>a</sup>, Andrea K. Steiger<sup>c</sup>, Michael D. Pluth<sup>c</sup>, Charles R. Tessier<sup>a</sup>, Troy A. Markel<sup>d</sup>, David Boone<sup>a</sup>, Robert V. Staheline<sup>e</sup>, Ines Batinic-Haberle<sup>f</sup>, and Karl D. Straub<sup>g,h</sup>

a. Indiana University School of Medicine - South Bend Center, South Bend, Indiana 46617 USA

b. Department of Biological Sciences, University of Notre Dame, Notre Dame IN 46556

c. Department of Chemistry and Biochemistry, University of Oregon, Eugene, OR 97403

d. Indiana University School of Medicine, Riley Hospital for Children at IU Health, 705 Riley Hospital Dr, RI 2500, Indianapolis, IN 46202

e. Department of Medicinal Chemistry and Molecular Pharmacology, Purdue University, West Lafayette, IN 47907

f. Department of Radiation Oncology, School of Medicine, Duke University, Durham, NC 27710

g. Central Arkansas Veteran's Healthcare System, Little Rock, AR 72205

h. Departments of Medicine and Biochemistry, University of Arkansas for Medical Sciences, Little Rock, AR 72202

**Running Head: Cellular Sulfide Metabolism by MnPs**

**Address correspondence to:**

Kenneth R. Olson, Ph.D.  
Indiana University School of Medicine -South Bend  
Raclin Carmichael Hall  
1234 Notre Dame Avenue  
South Bend, IN 46617  
**Phone:** (574) 631-7560  
**Fax:** (574) 631-7821  
**e-mail:** [olson.1@nd.edu](mailto:olson.1@nd.edu)

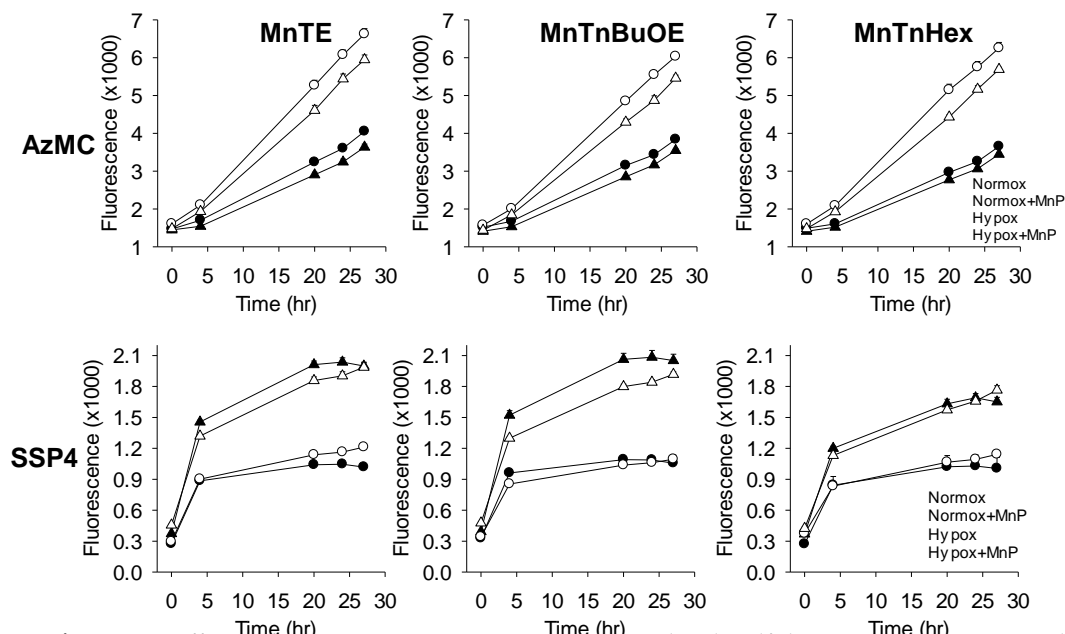

**Figure S1.** Effects of 0.3  $\mu\text{M}$  MnPs on  $\text{H}_2\text{S}$  (AzMC) and polysulfide (SSP4) in HEK 293 cells in hyperoxia (21%  $\text{O}_2$ , solid symbols) and physioxia (5%  $\text{O}_2$ , open symbols). Intracellular  $\text{H}_2\text{S}$  and polysulfides were increased in physioxia compared to hyperoxia, whereas the effects of MnPs were minimal in both conditions. Mean  $\pm$  SE,  $n=8$  wells per treatment.

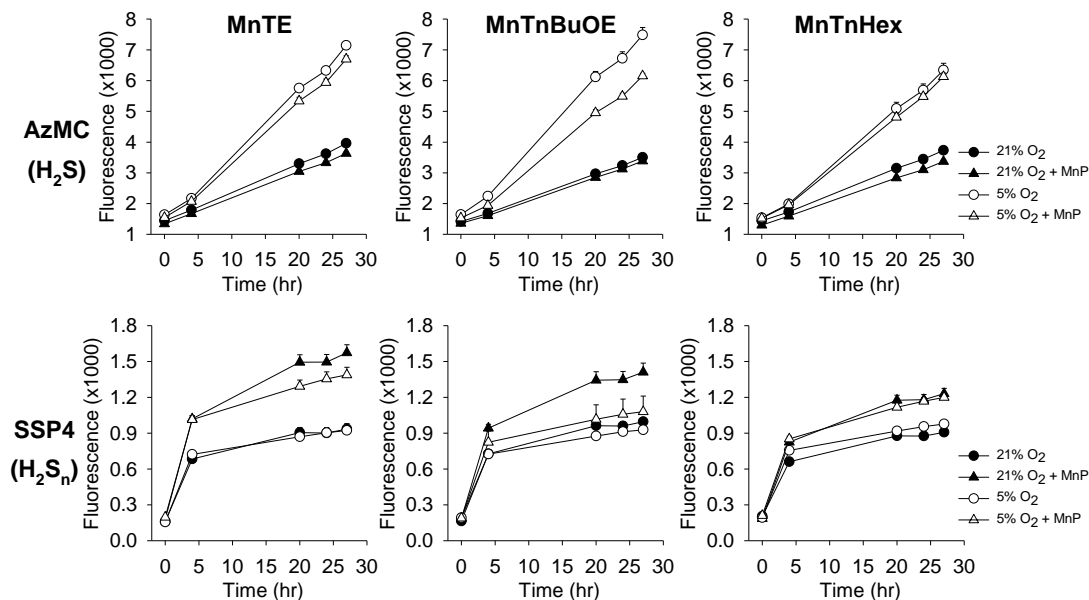

**Figure S2.** Effects of 0.03  $\mu\text{M}$  MnPs on  $\text{H}_2\text{S}$  (AzMC) and polysulfide (SSP4) in HEK 293 cells in hyperoxia (21%  $\text{O}_2$ , solid symbols) and physioxia (5%  $\text{O}_2$ , open symbols). Intracellular  $\text{H}_2\text{S}$  and polysulfides were increased in physioxia compared to hyperoxia. All MnPs decreased intracellular  $\text{H}_2\text{S}$  and increased intracellular polysulfides in both normoxia and hypoxia. Mean  $\pm$  SE,  $n=8$  wells per treatment.
